# Supplementary material
Source: PubMed Central journal article supplement (PMC4449720)
Supplement: Supp_Fig1.pdf [file Supp_Fig1.pdf]

## Supplementary Data

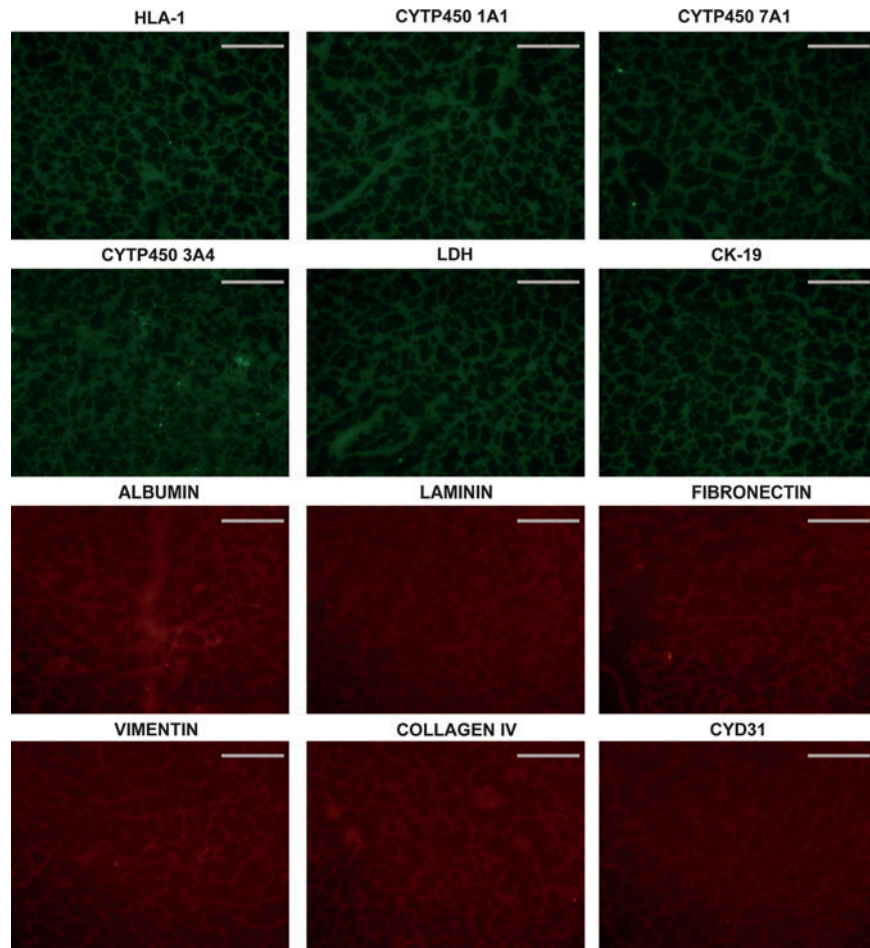

**SUPPLEMENTARY FIG. S1.** Representative micrographs of negative controls for human markers. Rat acellular bioscaffolds were incubated with anti-human primary antibodies. The absence of reactivity confirmed the specificity of antibodies. Only background signal was observed. Scale bar = 100  $\mu$ m.
